# Supplementary material for: Amplification of the EGFR and CCND1 Are Coordinated and Play Important Roles in the Progression of Oral Squamous Cell Carcinomas
Source: PubMed Central journal article supplement (PMC6627096; doi:10.3390/cancers11060760), 2019-05-31
Supplement: cancers-11-00760-s001.pdf [file cancers-11-00760-s001.pdf]

# Amplification of the *EGFR* and *CCND1* are Coordinated and Play Important Roles in the Progression of Oral Squamous Cell Carcinomas

Huei-Tzu Chien, Sou-De Cheng, Chun-Ta Liao, Hung-Ming Wang and Shiang-Fu Huang

Supplementary Material

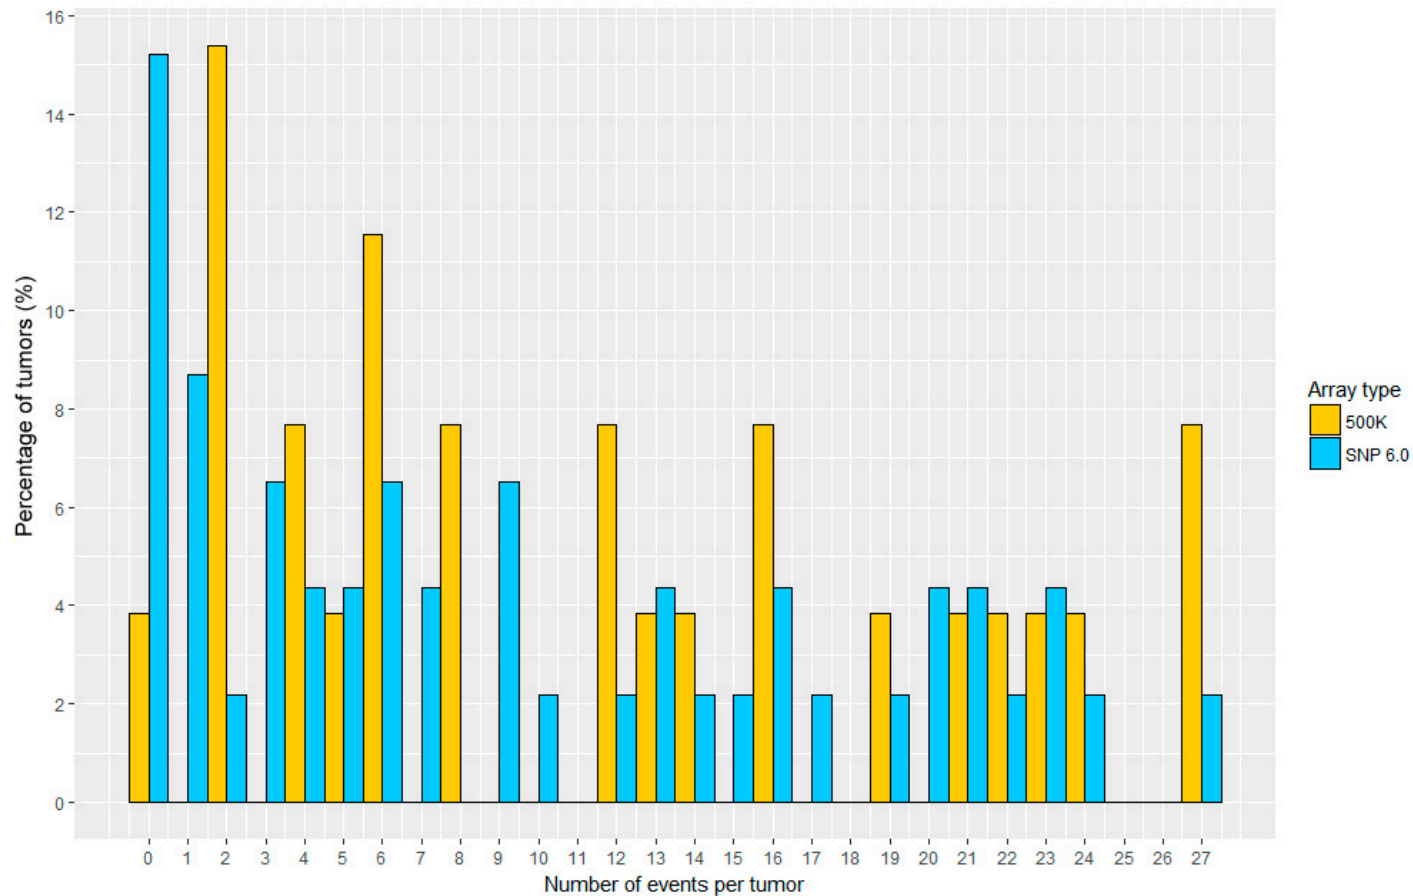

**Figure S1.** Distribution of the number of CNAs (events) per sample. Results are shown for the 500K array and Array SNP 6.0.

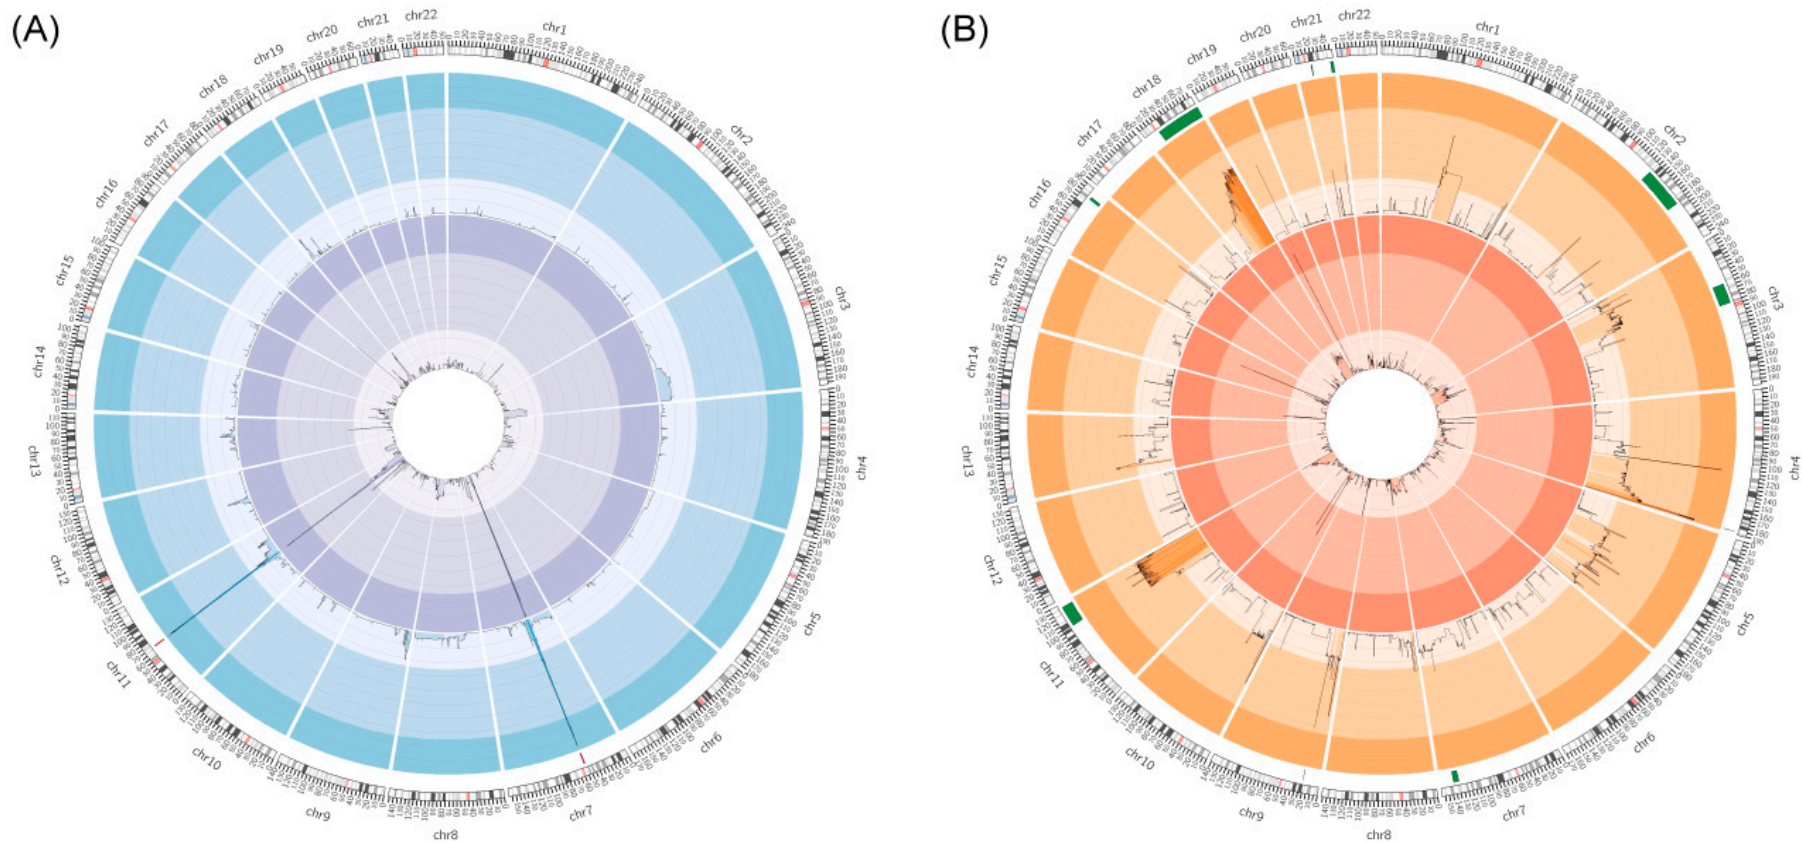

**Figure S2.** Circos plots of CNAs detected in 72 OSCCs by GISTIC. Chromosome bands and location are shown in outer rings. The curves indicate the G score in amplifications (A) and deletions (B). The results of SNP 500K are shown in the inner purple and pink rings, the results of SNP 6.0 are shown in the outer blue and orange rings. The red and green bars indicate 12 common CNAs. The two common CNAs in the amplification plot are the *EGFR* (7p11.2) and *CCND1* (11q13.3) gene locations.

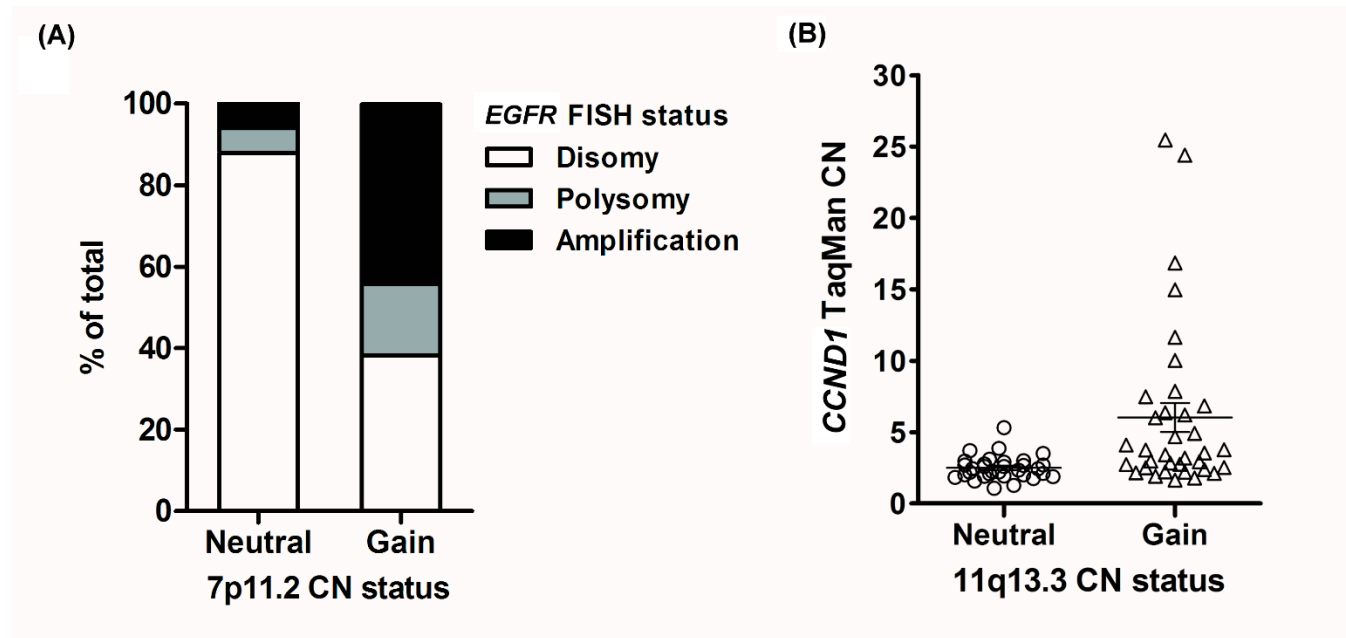

**Figure S3.** Validation of *EGFR* and *CCND1* genes copy number alterations. The validation of 7p11.2 CN status with *EGFR* gene copy number alterations (A), and 11q13.3 CN status with *CCND1* gene copy number (B).

**Table S1.** Distinct copy number gains and losses identified from 26 OSCCs using 500K array platform.

| Cytogenetic Loci | GISTIC Wide Peak Region (Mb <sup>a</sup> ) | Size (Mb <sup>a</sup> ) | <i>q</i> -Value | GISTIC <i>q</i> -Value | Frequency (%) | No. of Genes | Candidate Genes                                                          |
|------------------|--------------------------------------------|-------------------------|-----------------|------------------------|---------------|--------------|--------------------------------------------------------------------------|
| Gains            |                                            |                         |                 |                        |               |              |                                                                          |
| 7p11.2           | 54.62–55.86                                | 1.24                    | 0.016951        | 0.016951               | 53.85         | 7            | <i>SEC61G</i> , <i>EGFR</i>                                              |
| 11q13.3          | 68.96–70.07                                | 1.11                    | 0.027864        | 0.027864               | 53.85         | 8            | <i>MYEOV</i> , <i>CCND1</i> ,<br><i>ORAOV1</i> , <i>FADD</i>             |
| Losses           |                                            |                         |                 |                        |               |              |                                                                          |
| 1p32.2           | 57.17–57.32                                | 0.15                    | 0.12283         | 0.12283                | 3.85          | 1            |                                                                          |
| 1q23.2           | 160.11–160.18                              | 0.07                    | 0.025834        | 0.025834               | 15.38         | 2            |                                                                          |
| 2q23.3           | 124.78–243.20                              | 118.24                  | 0.1552          | 0.19111                | 11.54         | 730          | <i>ING5</i> , <i>LRP1B</i> , <i>DAPL1</i>                                |
| 2q37.1           | 234.98–235.89                              | 0.91                    | 0.03283         | 0.049553               | 23.08         | 1            |                                                                          |
| 3p26.1           | 0–198.02                                   | 198.02                  | 0.056468        | 0.21181                | 46.15         | 1276         | <i>FHIT</i> , <i>MLH1</i> , <i>BAP1</i> ,<br><i>SETD2</i> , <i>PBRM1</i> |
| 3p25.1           | 15.90–16.22                                | 0.32                    | 0.020471        | 0.051438               | 46.15         | 1            |                                                                          |
| 3p14.2           | 59.03–61.56                                | 2.53                    | 0.001605        | 0.0043938              | 46.15         | 1            | <i>FHIT</i>                                                              |
| 3p13             | 70.01–71.81                                | 1.8                     | 0.018395        | 0.10641                | 42.31         | 5            | <i>FOXP1</i>                                                             |
| 4p16.1           | 9.78–10.08                                 | 0.3                     | 0.000324        | 0.00032384             | 11.54         | 2            |                                                                          |

|          |               |       |          |            |       |     |                     |
|----------|---------------|-------|----------|------------|-------|-----|---------------------|
| 4p14     | 37.95–38.62   | 0.67  | 0.000779 | 0.0007788  | 46.15 | 2   | <i>PTTG2</i>        |
| 4q21.1   | 77.32–78.43   | 1.11  | 0.06449  | 0.066479   | 19.23 | 6   |                     |
| 4q35.2   | 187.48–188.24 | 0.76  | 0.00825  | 0.0082501  | 30.77 | 1   | <i>FAT1</i>         |
| 5q22.2   | 112.82–113.70 | 0.88  | 0.11882  | 0.10641    | 19.23 | 1   |                     |
| 6p22.1   | 29.95–29.98   | 0.03  | 0.025834 | 0.025834   | 11.54 | 1   |                     |
| 6q22.33  | 128.83–129.90 | 1.07  | 0.13407  | 0.13614    | 7.69  | 1   |                     |
| 7q11.22  | 66.03–75.12   | 9.09  | 0.10278  | 0.12283    | 15.38 | 72  |                     |
| 7q34     | 97.61–159.14  | 61.53 | 0.094196 | 0.10641    | 23.08 | 540 | <i>MIR335, ING3</i> |
| 8p23.3   | 0–0.6         | 0.6   | 0.13407  | 0.13614    | 50.00 | 5   |                     |
| 8p23.2   | 2.09–6.27     | 4.18  | 0.015837 | 0.015837   | 57.69 | 2   | <i>CSMD1</i>        |
| 9p22.2   | 17.50–18.47   | 0.97  | 0.000324 | 0.00032384 | 15.38 | 1   | <i>SH3GL2</i>       |
| 9p21.3   | 21.56–22.00   | 0.44  | 0.17047  | 0.1552     | 15.38 | 3   | <i>CDKN2A</i>       |
| 10p12.1  | 24.84–25.15   | 0.31  | 2.44E-12 | 2.44E-12   | 26.92 | 1   | <i>ARHGAP21</i>     |
| 10q11.21 | 44.01–44.10   | 0.09  | 2.39E-10 | 2.39E-10   | 15.38 | 1   |                     |
| 11q24.3  | 130.18–130.74 | 0.56  | 0.001145 | 0.0011447  | 38.46 | 2   |                     |
| 14q11.2  | 0–19.55       | 19.55 | 5.43E-05 | 0.00021774 | 42.31 | 2   |                     |
| 14q11.2  | 21.50–21.87   | 0.37  | 0.00434  | 0.015837   | 34.62 | 14  |                     |
| 15q14    | 37.39–38.55   | 1.16  | 0.14679  | 0.14679    | 15.38 | 1   |                     |
| 15q15.3  | 44.15–44.58   | 0.43  | 0.020471 | 0.020471   | 11.54 | 2   |                     |
| 15q21.3  | 57.57–57.67   | 0.1   | 2.30E-18 | 2.30E-18   | 53.85 | 1   |                     |
| 16q23.1  | 75.46–75.51   | 0.5   | 0.10129  | 0.094196   | 7.69  | 1   |                     |
| 17q12    | 36.10–36.59   | 0.49  | 0.17999  | 0.19111    | 11.54 | 7   |                     |
| 18q11.2  | 0–78.08       | 78.08 | 0.091647 | 0.28995    | 23.08 | 342 | <i>DCC</i>          |
| 18q11.2  | 18.69–78.08   | 59.39 | 0.022731 | 0.1552     | 26.92 | 253 | <i>DCC</i>          |
| 18q12.1  | 32.38–32.45   | 0.07  | 0.00434  | 0.031519   | 30.77 | 1   |                     |
| 18q21.1  | 20.83–78.08   | 57.25 | 0.00825  | 0.094196   | 30.77 | 238 | <i>DCC</i>          |
| 19p13.11 | 17.54–17.64   | 0.1   | 1.92E-29 | 1.92E-29   | 50.00 | 4   |                     |
| 21q21.1  | 10.19–29.10   | 18.91 | 0.16022  | 0.1552     | 26.92 | 56  | <i>CHODL</i>        |
| 21q22.3  | 44.59–45.53   | 0.94  | 0.065272 | 0.084587   | 23.08 | 11  |                     |
| 21q22.3  | 46.65–48.13   | 1.48  | 0.18257  | 0.2485     | 23.08 | 21  |                     |

<sup>a</sup>Mb: mega base pair.

**Table S2.** Distinct copy number gains and losses identified from 46 OSCCs using SNP 6.0 platform.

| Cytogenetic Loci | GISTIC Wide Peak Region (Mb <sup>a</sup> ) | Size (Mb) | <i>q</i> -Value | GISTIC <i>q</i> -Value | Frequency (%) | No. of Genes | Candidate Genes                                                                    |
|------------------|--------------------------------------------|-----------|-----------------|------------------------|---------------|--------------|------------------------------------------------------------------------------------|
|                  |                                            |           |                 |                        |               |              | Gains                                                                              |
| 7p11.2           | 54.30–54.35                                | 0.05      | 2.41E-12        | 0.00030515             | 45.65         | 0            |                                                                                    |
| 7p11.2           | 55.06–55.27                                | 0.21      | 1.56E-13        | 1.09E-08               | 50.00         | 1            | <i>EGFR</i>                                                                        |
| 11q13.3          | 69.03–69.17                                | 0.14      | 1.56E-13        | 1.96E-08               | 47.83         | 1            | <i>MYEOV</i>                                                                       |
| 11q13.3          | 70.11–70.32                                | 0.21      | 1.56E-13        | 2.70E-07               | 47.83         | 4            | <i>CTN</i>                                                                         |
|                  |                                            |           |                 |                        |               |              | Losses                                                                             |
| 1p13.2           | 112.30–112.94                              | 0.64      | 0.029884        | 0.18362                | 10.87         | 2            |                                                                                    |
| 1p13.1           | 116.92–116.95                              | 0.03      | 0.00041581      | 0.003203               | 15.22         | 1            |                                                                                    |
| 1q43             | 0–249.25                                   | 249.25    | 0.24251         | 0.24251                | 8.70          | 2410         | <i>CDKN2C, FCGR2B, MUTYH, MYCL1, RPL5, SDHB, ARID1A, TNFRSF14, CAMTA1, SLC45A3</i> |
| 1q44             | 245.28–245.91                              | 0.63      | 0.18362         | 0.18362                | 6.52          | 1            |                                                                                    |
| 2q21.2           | 133.42–187.56                              | 54.14     | 0.012241        | 0.01224                | 8.70          | 227          | <i>ING5, LRP1B, DAPL1</i>                                                          |
| 3p25.2           | 12.39–12.53                                | 0.14      | 0.0054874       | 0.080113               | 50.00         | 1            | <i>PPARG</i>                                                                       |
| 3p24.2           | 24.56–25.65                                | 0.09      | 0.0045225       | 0.028436               | 50.00         | 2            | <i>RARB</i>                                                                        |
| 3p12.1           | 25.64–93.78                                | 68.14     | 0.13612         | 0.12649                | 39.13         | 453          | <i>FHIT, MLH1, BAP1, SETD2, PBRM1</i>                                              |
| 4q25             | 109.08–109.54                              | 0.46      | 1.5071E-06      | 1.62E-06               | 23.91         | 2            |                                                                                    |
| 4q35.2           | 187.48–188.23                              | 0.75      | 1.7569E-06      | 1.3E-05                | 36.96         | 1            | <i>FAT1</i>                                                                        |
| 5q11.2           | 44.81–110.41                               | 65.6      | 0.022564        | 0.080113               | 26.09         | 265          |                                                                                    |
| 5q23.1           | 118.97–121.19                              | 2.22      | 0.0032652       | 0.040879               | 30.43         | 2            |                                                                                    |
| 5q33.3           | 61.87–180.92                               | 119.05    | 0.016923        | 0.12649                | 26.09         | 806          |                                                                                    |
| 7q33             | 95.23–159.14                               | 63.91     | 0.16769         | 0.1701                 | 15.22         | 554          | <i>ING3</i>                                                                        |
| 8p23.1           | 8.56–8.86                                  | 0.3       | 0.23346         | 0.23346                | 54.35         | 1            |                                                                                    |
| 9p24.2           | 3.90–4.15                                  | 0.25      | 0.00044905      | 0.001869               | 23.91         | 1            |                                                                                    |
| 9p21.3           | 21.96–21.98                                | 0.02      | 0.000024325     | 0.00047                | 32.61         | 2            | <i>CDKN2A</i>                                                                      |
| 10p15.3          | 1.21–1.60                                  | 0.39      | 0.00085355      | 0.001942               | 26.09         | 1            |                                                                                    |
| 10p15.1          | 5.04–5.09                                  | 0.05      | 0.0098168       | 0.096819               | 28.26         | 1            | <i>AKR1C2</i>                                                                      |
| 11q22.3          | 83.17–135.01                               | 51.84     | 0.00052488      | 0.00452                | 30.43         | 400          | <i>CHEK1, H2AFX, MRE11A, ATM</i>                                                   |
| 11q23.3          | 72.39–135.01                               | 62.62     | 0.00042996      | 0.09682                | 36.96         | 489          | <i>CHEK1, H2AFX, MRE11A, ATM</i>                                                   |
| 13q11            | 0–23.90                                    | 23.90     | 0.02593         | 0.028436               | 26.09         | 29           | <i>GJB2, LATS2, CRYL1</i>                                                          |
| 13q22.3          | 78.34–79.18                                | 0.84      | 0.065075        | 0.064205               | 15.22         | 1            | <i>EDNRB</i>                                                                       |
| 16q23.1          | 78.13–79.63                                | 1.5       | 0.13003         | 0.12649                | 13.04         | 1            | <i>WWOX</i>                                                                        |
| 18q22.3          | 51.06–78.08                                | 27.02     | 0.00041581      | 0.00042                | 43.48         | 106          | <i>BCL2</i>                                                                        |
| 19q12            | 30.20–30.41                                | 0.21      | 0.0022153       | 0.001942               | 10.87         | 1            | <i>CCNE1</i>                                                                       |
| 21q21.1          | 19.26–19.64                                | 0.38      | 0.080113        | 0.08011                | 36.96         | 1            | <i>CHODL</i>                                                                       |
| 21q22.3          | 44.30–44.40                                | 0.1       | 0.043869        | 0.04088                | 39.13         | 1            | <i>NDUFV3</i>                                                                      |

<sup>a</sup>Mb: mega base pair.

**Table 3.** Distinct copy number gains and losses identified from 68 OSCCs randomly extracted from GSE25103 data repository.

| Cytogenetic Loci     | Gains                                      |           |                   | Losses                |                              |           |                   |
|----------------------|--------------------------------------------|-----------|-------------------|-----------------------|------------------------------|-----------|-------------------|
|                      | GISTIC Wide Peak region (Mb <sup>a</sup> ) | Size (Mb) | GISTIC $q$ -Value | Cytogenetic Loci      | GISTIC Wide Peak region (Mb) | Size (Mb) | GISTIC $q$ -Value |
| 2q11.2               | 97.5–97.62                                 | 0.12      | 0.00079806        | 1p31.3                | 64.24–64.61                  | 0.37      | 0.0011493         |
| 7p11.2 <sup>b</sup>  | 55.76–55.79                                | 0.03      | 0.00041856        | 1p13.2                | 112.30–112.94                | 0.64      | 0.0089268         |
| 9p24.1               | 5.38–5.72                                  | 0.34      | 0.0068263         | 1q43                  | 236.77–236.96                | 0.19      | 0.021557          |
| 11q13.3 <sup>b</sup> | 70.12–70.15                                | 0.03      | 2.49E-09          | 1q44                  | 245.86–247.05                | 1.19      | 0.087333          |
| 11q22.1              | 101.26–101.29                              | 0.03      | 5.69E-07          | 2p22.3                | 0–243.20                     | 243.20    | 0.086976          |
| 11q22.1              | 101.67–101.69                              | 0.02      | 9.38E-06          | 2p22.3                | 0–243.20                     | 243.20    | 0.064816          |
| 11q22.2              | 102.64–102.98                              | 0.34      | 7.68E-05          | 2q21.2                | 133.42–134.89                | 1.47      | 2.82E-15          |
| 11q13.3              | 68.72–68.85                                | 0.13      | 6.25E-05          | 2q22.1                | 139.66–143.64                | 3.98      | 0.045925          |
|                      |                                            |           |                   | 2q32.1                | 186.70–187.46                | 0.76      | 0.0023355         |
|                      |                                            |           |                   | 2q35                  | 204.79–243.20                | 38.41     | 0.0023355         |
|                      |                                            |           |                   | 2q33.3                | 204.83–222.29                | 17.46     | 0.004378          |
|                      |                                            |           |                   | 3p26.3                | 0–72.90                      | 72.90     | 0.0027105         |
|                      |                                            |           |                   | 3p26.1                | 4.36–4.54                    | 0.18      | 2.73E-05          |
|                      |                                            |           |                   | 3p22.1                | 17.20–61.24                  | 44.04     | 0.0023355         |
|                      |                                            |           |                   | 4q25                  | 109.08–109.54                | 0.46      | 0.079403          |
|                      |                                            |           |                   | 4q35.2 <sup>b</sup>   | 187.48–188.23                | 0.75      | 0.0023355         |
|                      |                                            |           |                   | 5q11.2                | 58.26–59.79                  | 1.53      | 0.0002868         |
|                      |                                            |           |                   | 5q15                  | 93.45–93.96                  | 0.51      | 0.0069236         |
|                      |                                            |           |                   | 5q33.1                | 150.87–151.04                | 0.17      | 0.13923           |
|                      |                                            |           |                   | 5q34                  | 159.91–160.36                | 0.45      | 0.051805          |
|                      |                                            |           |                   | 6p21.1                | 41.18–41.22                  | 0.04      | 0.060272          |
|                      |                                            |           |                   | 7q31.1 <sup>b</sup>   | 110.73–111.37                | 0.64      | 0.0076292         |
|                      |                                            |           |                   | 7q36.1 <sup>b</sup>   | 132.92–159.14                | 26.22     | 0.042691          |
|                      |                                            |           |                   | 8p23.2                | 2.09–6.26                    | 4.17      | 2.13E-11          |
|                      |                                            |           |                   | 8p23.1                | 6.60–6.61                    | 0.01      | 5.55E-05          |
|                      |                                            |           |                   | 8q11.2                | 51.71–52.73                  | 1.56      | 0.046378          |
|                      |                                            |           |                   | 9p24.1                | 4.86–5.16                    | 0.3       | 0.0001564         |
|                      |                                            |           |                   | 9p24.1                | 8.31–12.69                   | 4.38      | 0.0002017         |
|                      |                                            |           |                   | 9p21.3                | 20.71–21.01                  | 0.3       | 6.34E-05          |
|                      |                                            |           |                   | 9p21.3 <sup>b</sup>   | 21.96–21.98                  | 0.02      | 1.84E-13          |
|                      |                                            |           |                   | 10p15.3               | 1.21–1.60                    | 0.39      | 2.20E-22          |
|                      |                                            |           |                   | 10q23.32              | 0–135.53                     | 135.53    | 0.20781           |
|                      |                                            |           |                   | 11q24.3 <sup>b</sup>  | 118.39–135.01                | 16.62     | 0.0023355         |
|                      |                                            |           |                   | 16p13.2               | 9.33–10.48                   | 1.15      | 0.045925          |
|                      |                                            |           |                   | 16q23.2               | 80.58–81.01                  | 0.43      | 1.20E-05          |
|                      |                                            |           |                   | 16q23.3               | 82.20–83.84                  | 1.64      | 0.043591          |
|                      |                                            |           |                   | 17p12                 | 10.74–11.50                  | 0.76      | 0.019221          |
|                      |                                            |           |                   | 18q12.2               | 21.90–78.08                  | 56.18     | 0.010034          |
|                      |                                            |           |                   | 18q21.32 <sup>b</sup> | 42.79–78.08                  | 35.29     | 5.55E-05          |
|                      |                                            |           |                   | 19p13.3               | 6.11–6.22                    | 0.11      | 0.052629          |
|                      |                                            |           |                   | 19q13.12              | 37.73–37.83                  | 0.1       | 0.0066528         |
|                      |                                            |           |                   | 21q22.3 <sup>b</sup>  | 0–48.13                      | 48.13     | 0.21923           |

22q13.2

27.07-51.30

24.23

0.17385

---

<sup>a</sup>Mb: mega base pair. <sup>b</sup>CNA loci that also identified in the 12 common CNAs.

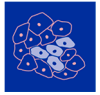

1

**Table 4.** Association between *EGFR* and *CCND1* genes CN status.

|                |                        | CCND1 CN Status |               |
|----------------|------------------------|-----------------|---------------|
|                |                        | Neutral         | Amplification |
| EGFR CN status | Disomy                 | 99 (39%)        | 79 (31%)      |
|                | Polysomy/amplification | 23 (9%)         | 56 (22%)      |

2
